# Supplementary material for: Upregulation of miR-205 induces CHN1 expression, which is associated with the aggressive behaviour of cervical cancer cells and correlated with lymph node metastasis
Source: PubMed Central journal article supplement (PMC7590479; doi:10.1186/s12885-020-07478-w), 2020-10-27

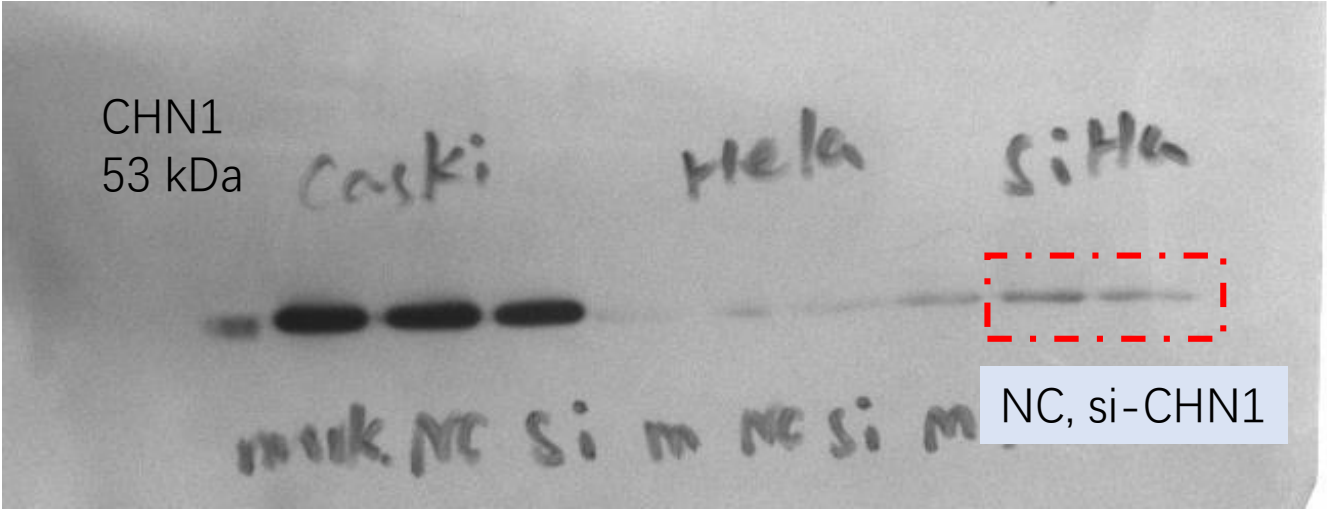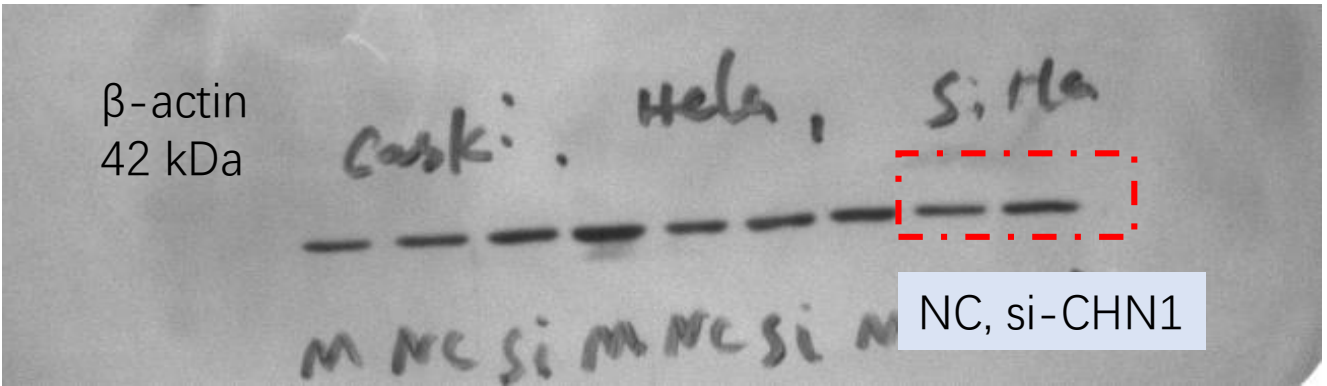

Supplement: 12885_2020_7478_MOESM2_ESM.pdf [file 12885_2020_7478_MOESM2_ESM.pdf]
